# Supplementary material
Source: PubMed Central journal article supplement (PMC3873500)
Supplement: mmc1.pdf [file mmc1.pdf]

Supplementary Figure S1

Case 1

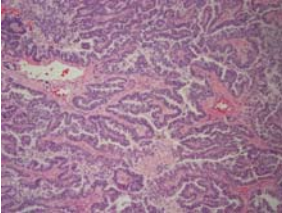

• FFPE 60%

Case 2

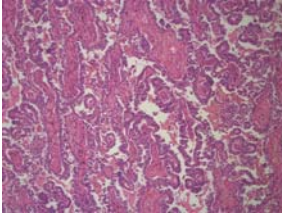

• FFPE 50%

Case 3

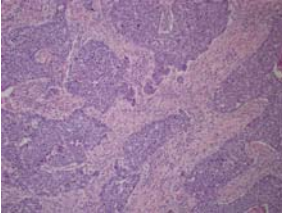

• FFPE 60%

Case 4

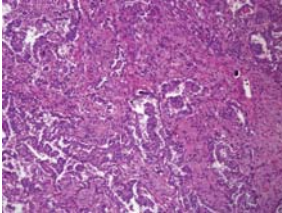

• FFPE 50%

Case 5

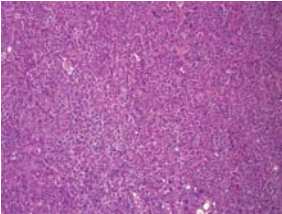

• FFPE 90%

Case 6

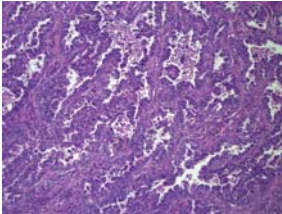

• FFPE 70%

Case 7

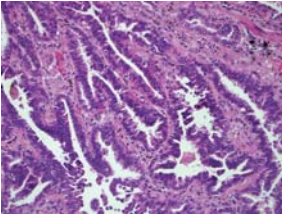

• FFPE 60%

Case 8

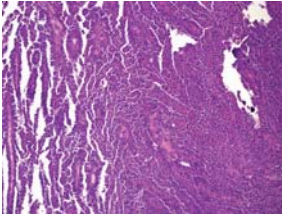

• FFPE 80%

Case 9

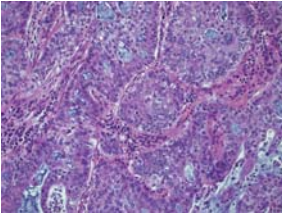

• FFPE 60%

Case 10

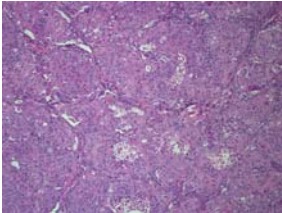

• FFPE 70%

Case 11

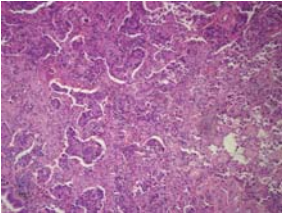

• FFPE 30%

Case 12

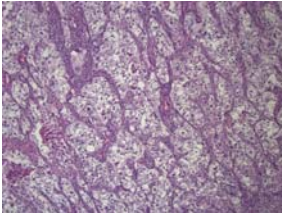

• FFPE 30%

Case 13

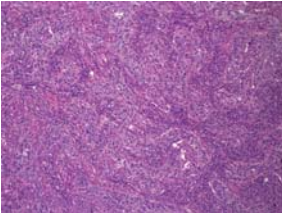

• FFPE 40%

Case 14

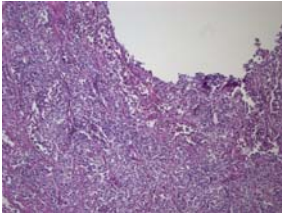

• FFPE 70%

Case 15

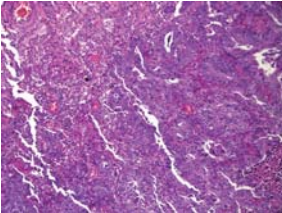

• FFPE 40%

Case 16

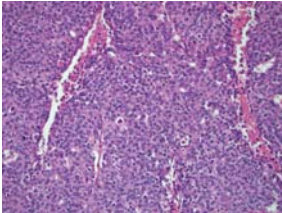

• FFPE 90%
