# Supplementary material
Source: PubMed Central journal article supplement (PMC3873500)
Supplement: mmc3.pdf [file mmc3.pdf]

Supplemental Figure S3

**chr12:25358422-25358426**  
**Insertion AA**

AAGCACAATGTACAAAATGTGCATGTGTCTCTTT

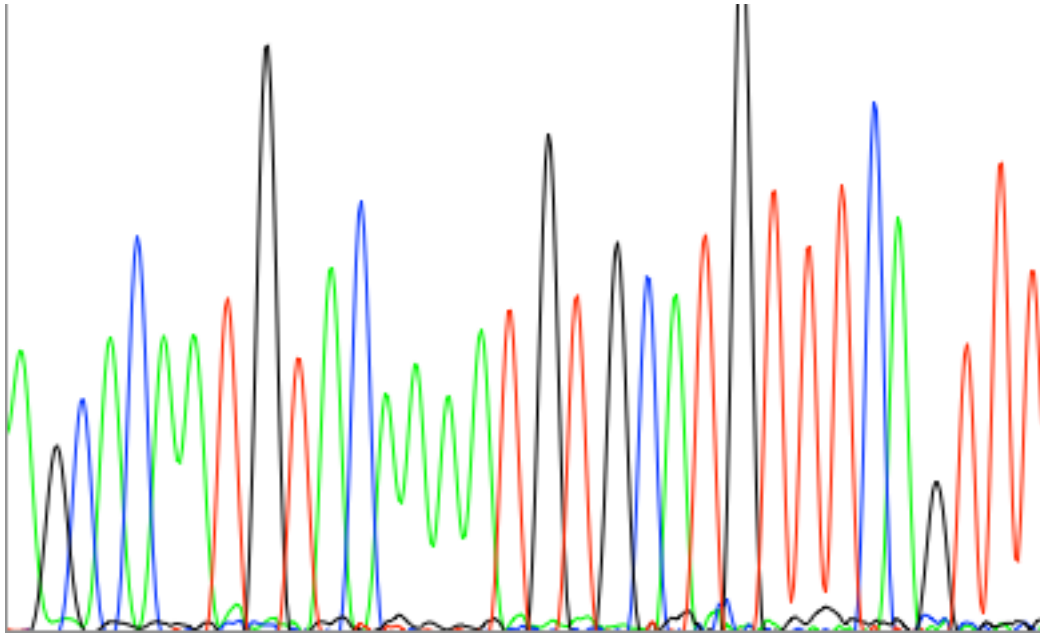

**NA17989**

AGCACAATGTACAAAATGTGCATGTTTCAGTTT

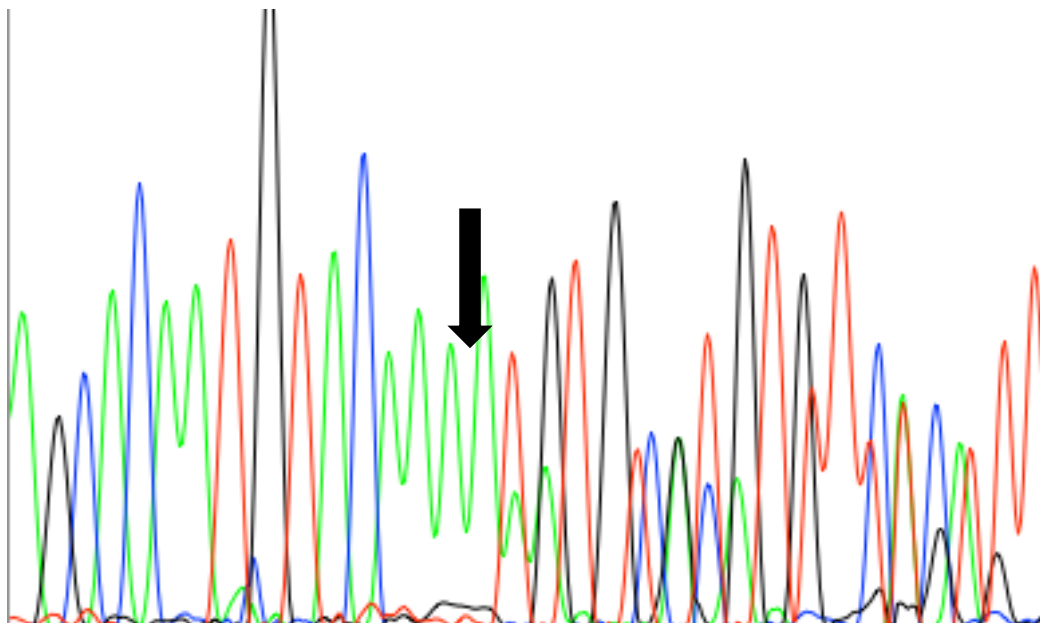

**NA18484**
