# Supplementary material
Source: PubMed Central journal article supplement (PMC3873500)
Supplement: mmc4.pdf [file mmc4.pdf]

Supplemental Figure S4

**chr2:25565387-25565393**  
**Insertion CC**

TCAAGTGCCTCCCCCGCAGCCCGCGGAGCC

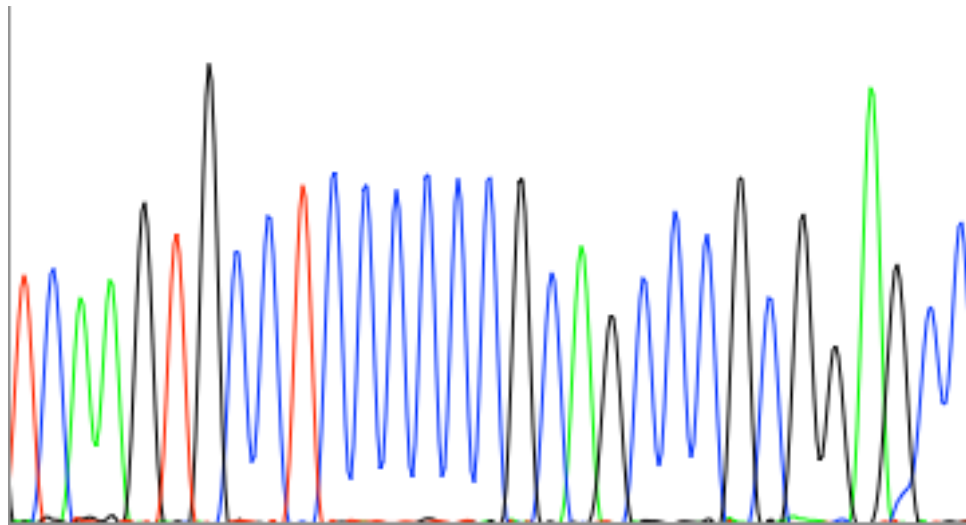

**NA17989**

TCAAGTGCCTCCCCCGCGGACCGCGGAGACC

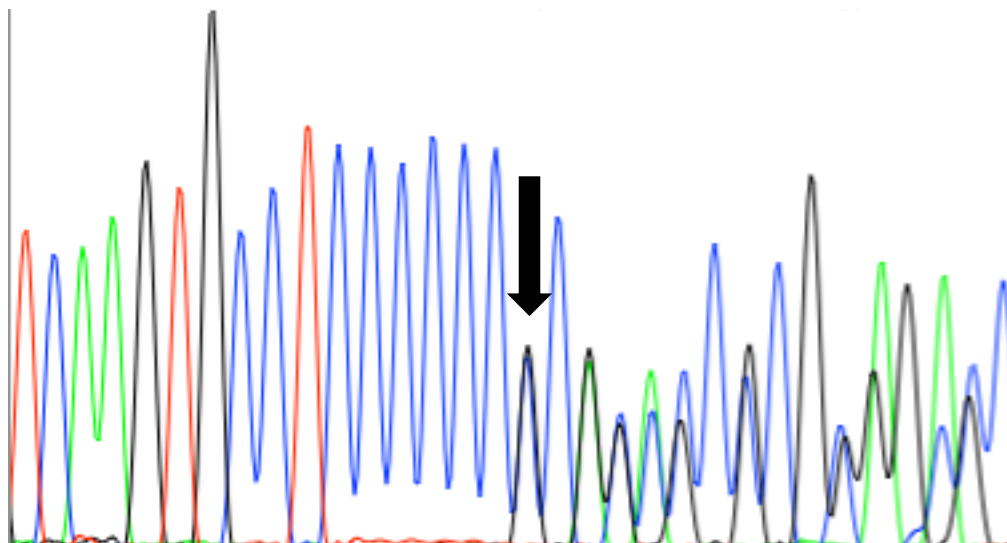

**NA18484**
