# Supplementary material
Source: PubMed Central journal article supplement (PMC3873500)
Supplement: mmc5.pdf [file mmc5.pdf]

Supplemental Figure S5

**chr4:55163821-55163838**  
**Insertion TG**

GTGTTTTTCAGCAAATTCCAGATTTGTTT

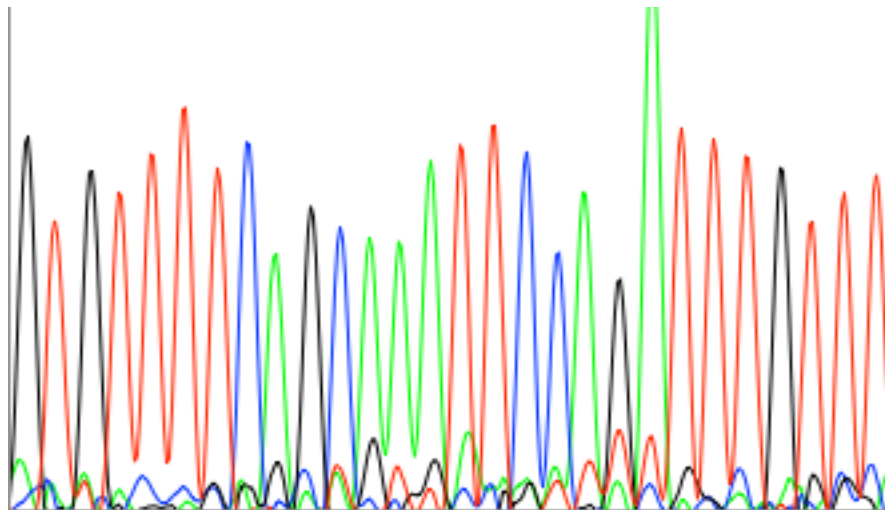

**NA17989**

GTGTTTTTCAGCGAATTCCAGATTTGTTT

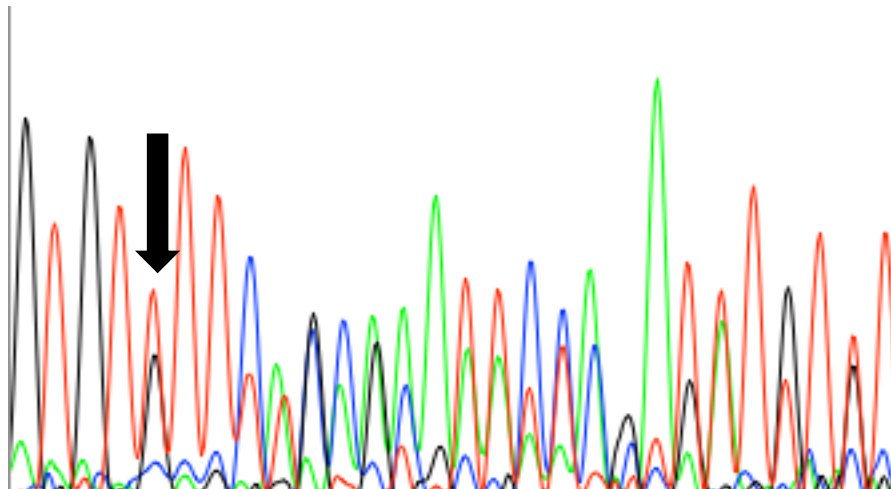

**NA18484**
