# Supplementary material
Source: PubMed Central journal article supplement (PMC3873500)
Supplement: mmc6.pdf [file mmc6.pdf]

Supplemental Figure S6

**chr5:149492849-149492873**  
**Deletion CTCTTC**

TCTTCTCTCTTCTCCACCTTCTCCT

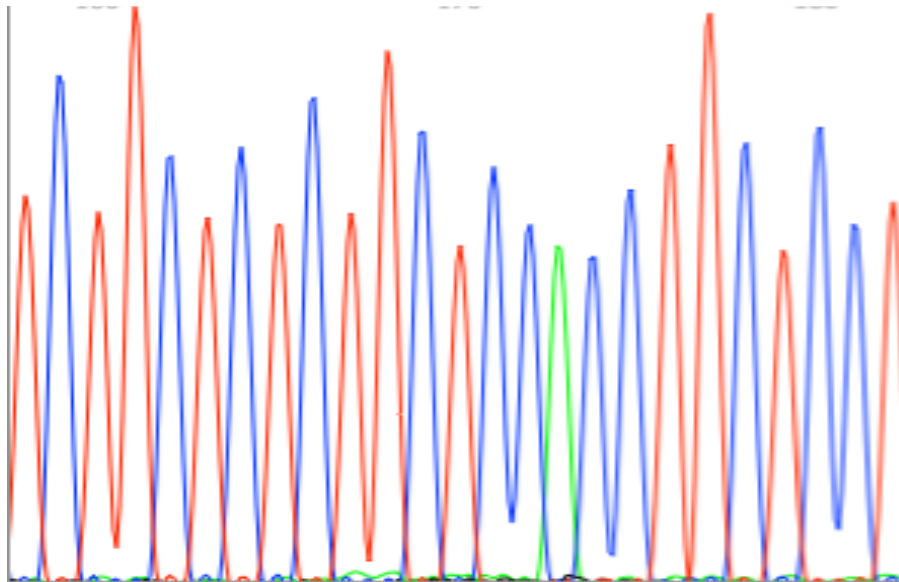

**NA17989**

TCTTCCCCCTTCCCCTTCTTCACCT

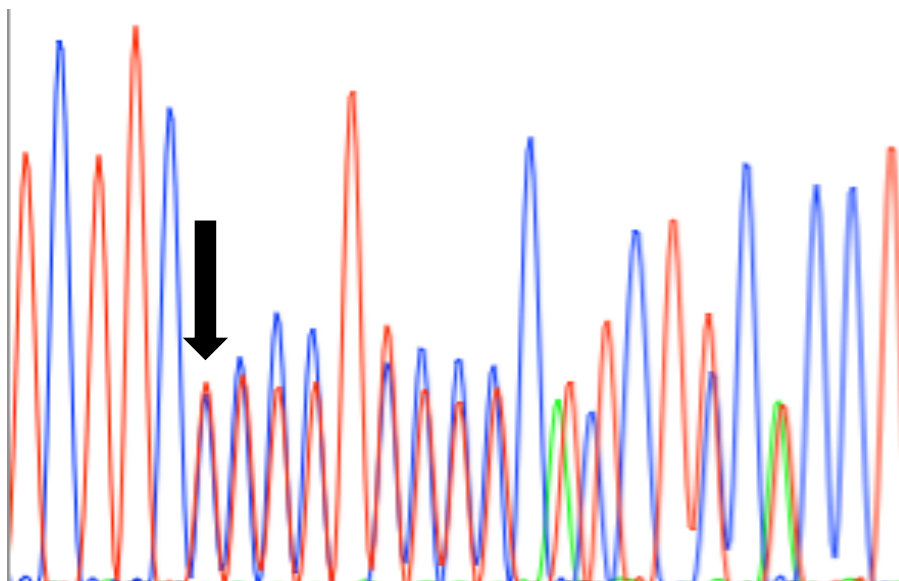

**N18507**
