# Supplementary material
Source: PubMed Central journal article supplement (PMC3873500)

Supplemental Figure S2

**chr1:115247749-115247757**  
**Deletion A**

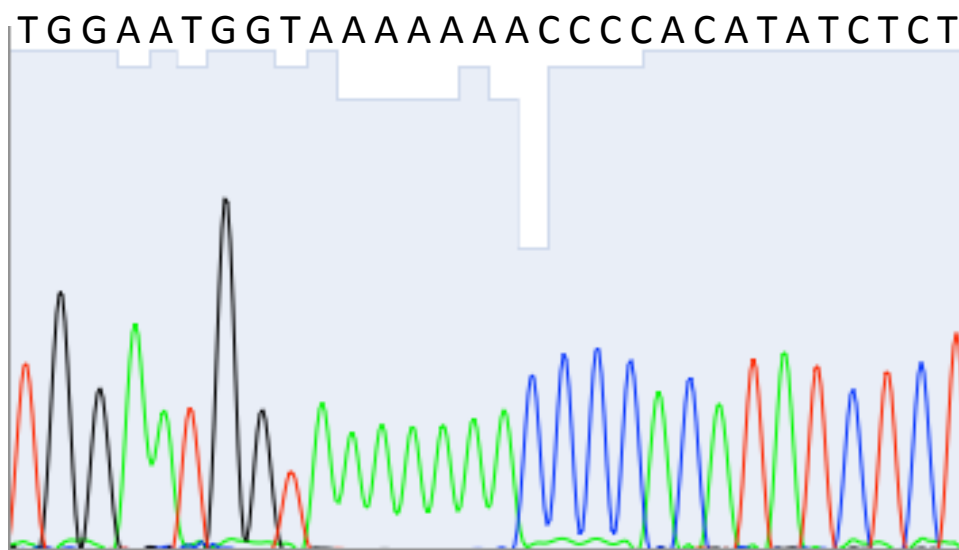

**NA17989**

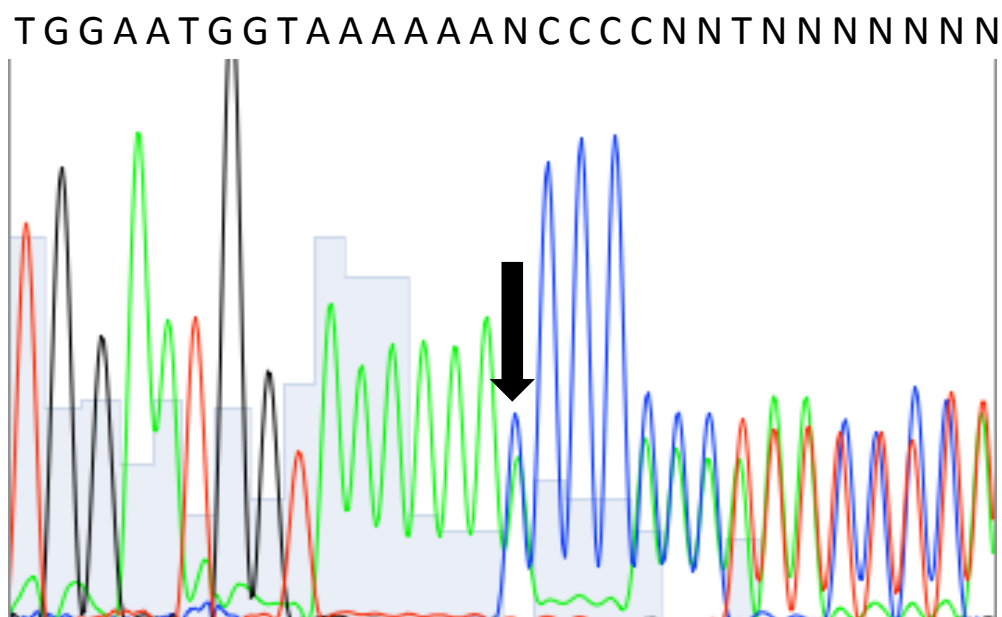

**NA18484**

Supplement: mmc2.pdf [file mmc2.pdf]

# Sensitivity

minor gold standard variants (Hapmap v3.3 variants only)

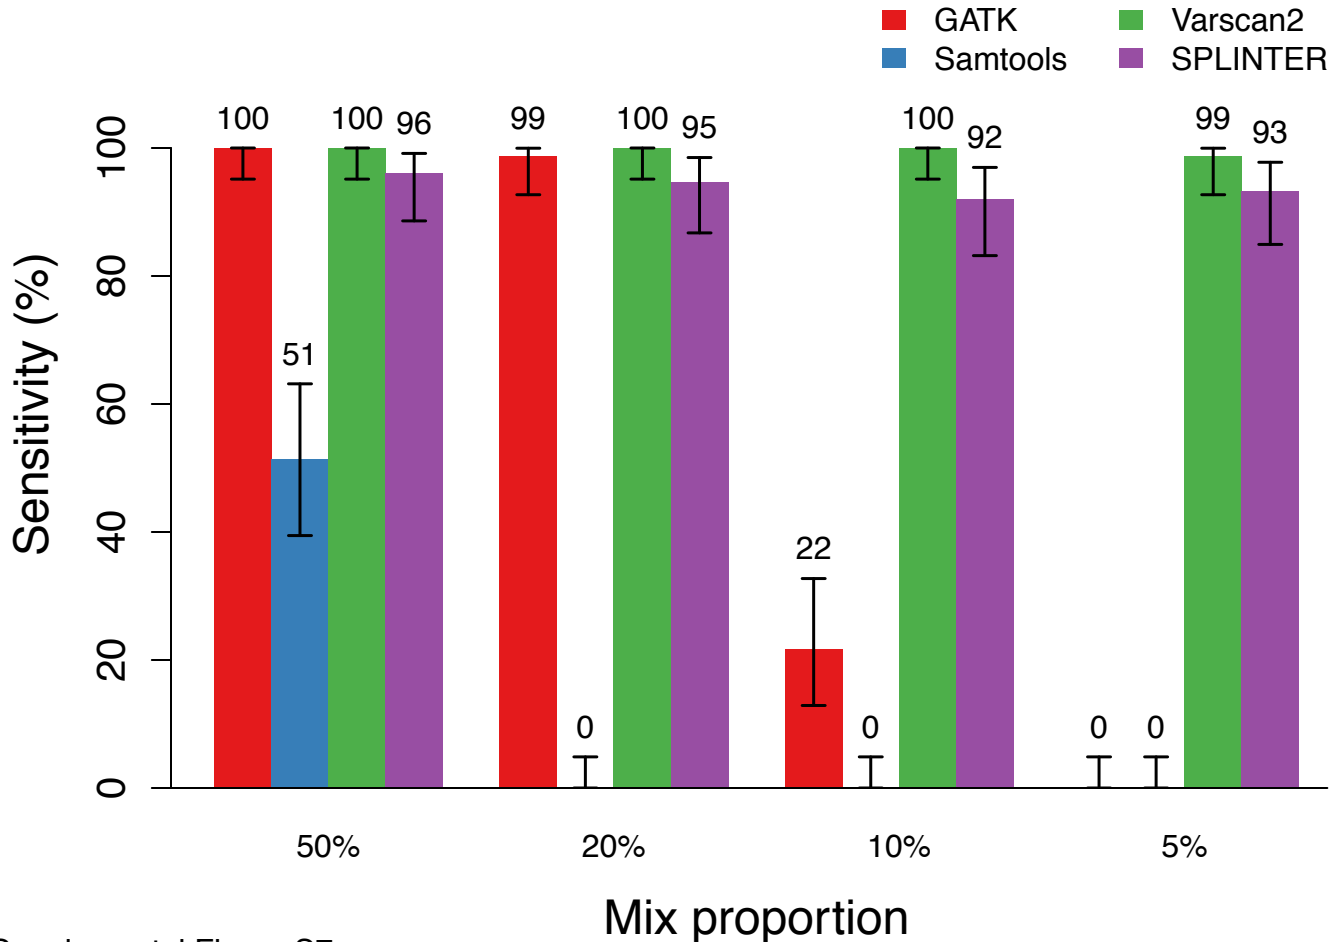

Supplement: mmc7.pdf [file mmc7.pdf]

Supplemental Figure S8

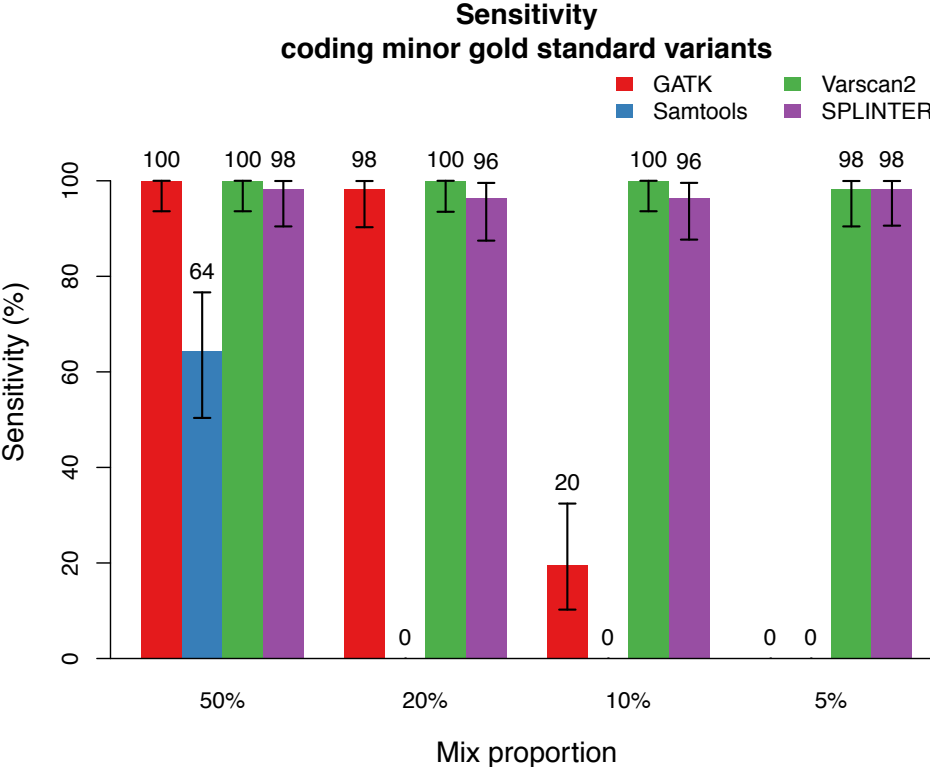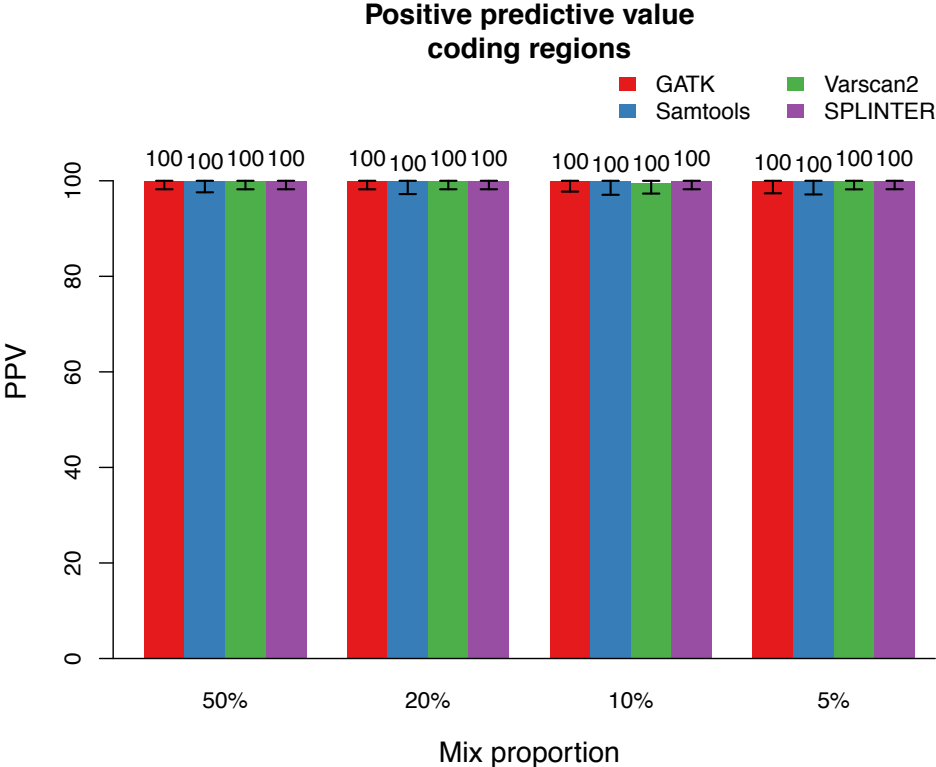

Supplement: mmc8.pdf [file mmc8.pdf]

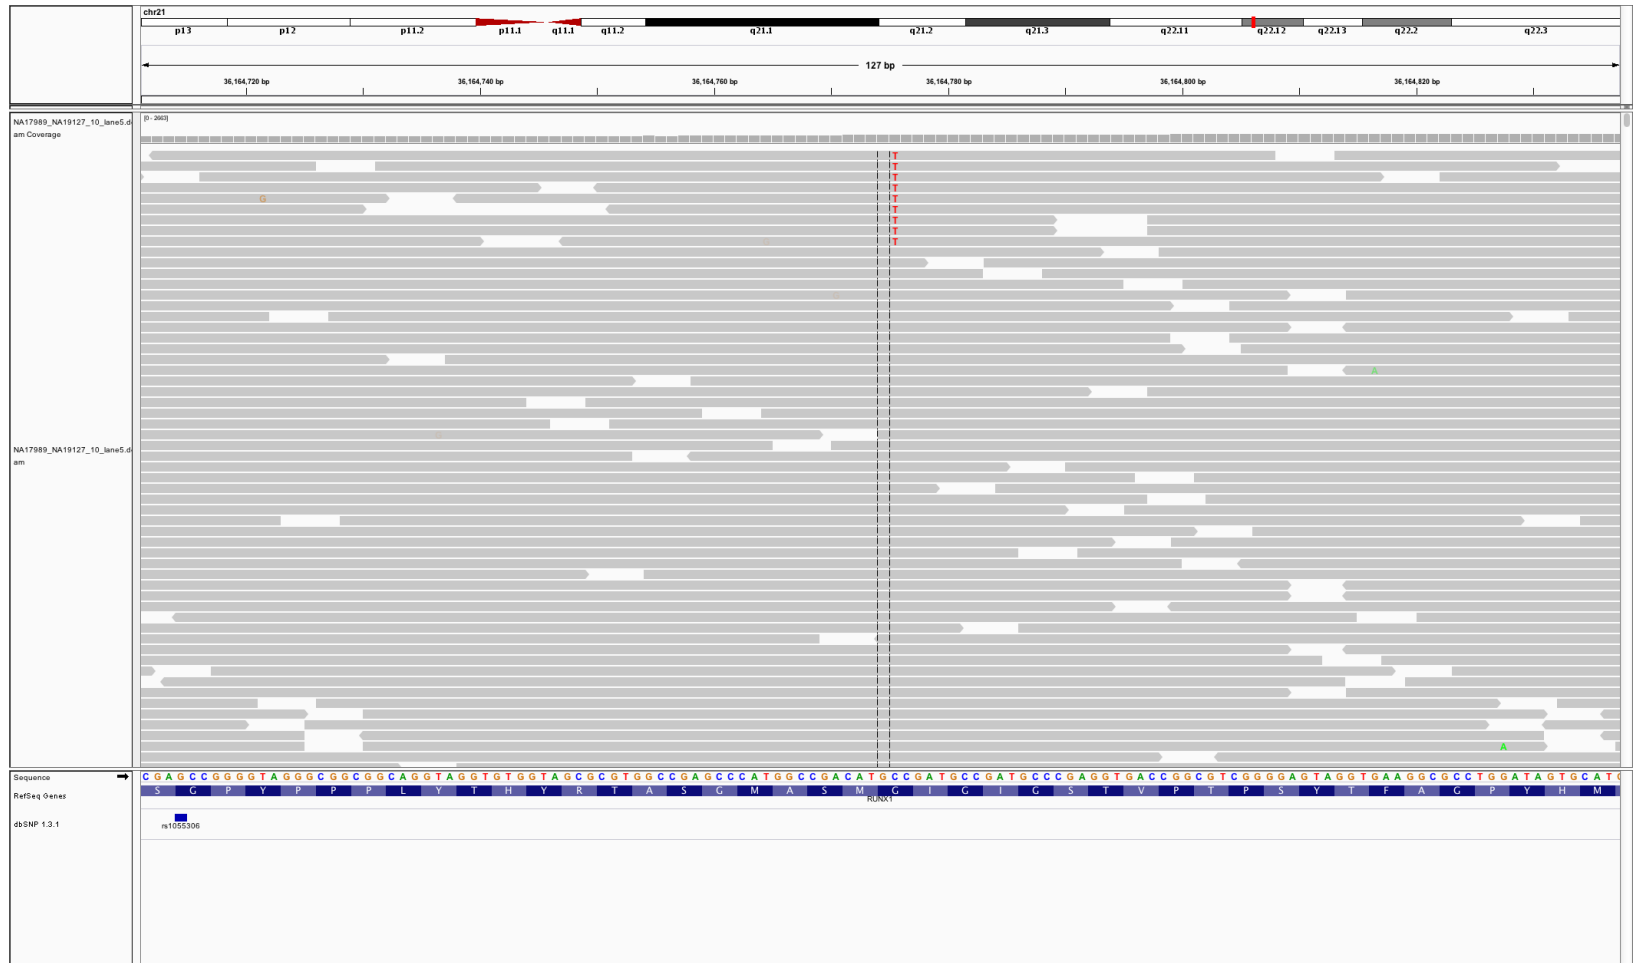

Supplemental Figure S9

Supplement: mmc9.pdf [file mmc9.pdf]
